## NLP COVID-19, Schöning (2021)

1 **Automatic identification of risk factors for SARS-CoV-2**  
2 **positivity and severe clinical outcomes of COVID-19 using Data**  
3 **Mining and Natural Language Processing**

4

5 **Authors:** Verena Schöning<sup>1</sup>, Evangelia Liakoni<sup>1</sup>, Jürgen Drewe<sup>2</sup>, Felix  
6 Hammann<sup>1,\*</sup>

7

8 (1) Clinical Pharmacology and Toxicology, Department of General Internal  
9 Medicine, Inselspital, Bern University Hospital, University of Bern, Bern,  
10 Switzerland

11 (2) Department of Clinical Pharmacology, University Hospital Basel, Basel,  
12 Switzerland

13

14 \* Corresponding Author:

15 Felix Hammann, MD, PhD

16 Clinical Pharmacology and Toxicology, Department of General Internal  
17 Medicine, Inselspital, Bern University Hospital, Freiburgstrasse, 3010 Bern,  
18 Switzerland

19 Felix.Hammann@insel.ch

20

21 **Keywords**

22 SARS-CoV-2, COVID-19, risk factors, electronic health records, natural  
23 language processing

24

25

## 26 **ABSTRACT**

27 **Objectives:** Several risk factors have been identified for severe clinical  
28 outcomes of COVID-19 caused by SARS-CoV-2. Some can be found in  
29 structured data of patients' Electronic Health Records. Others are included as  
30 unstructured free-text, and thus cannot be easily detected automatically. We  
31 propose an automated real-time detection of risk factors using a combination  
32 of data mining and Natural Language Processing (NLP).

33 **Material and methods:** Patients were categorized as negative or positive for  
34 SARS-CoV-2, and according to disease severity (severe or non-severe COVID-  
35 19). Comorbidities were identified in the unstructured free-text using NLP.  
36 Further risk factors were taken from the structured data.

37 **Results:** 6250 patients were analysed (5664 negative and 586 positive; 461  
38 non-severe and 125 severe). Using NLP, comorbidities, i.e. cardiovascular and  
39 pulmonary conditions, diabetes, dementia and cancer, were automatically  
40 detected (error rate  $\leq 2\%$ ). Old age, male sex, higher BMI, arterial hypertension,  
41 chronic heart failure, coronary heart disease, COPD, diabetes, insulin only  
42 treatment of diabetic patients, reduced kidney and liver function were risk  
43 factors for severe COVID-19. Interestingly, the proportion of diabetic patients  
44 using metformin but not insulin was significantly higher in the non-severe  
45 COVID-19 cohort ( $p < 0.05$ ).

46 **Discussion and conclusion:** Our findings were in line with previously reported  
47 risk factors for severe COVID-19. NLP in combination with other data mining  
48 approaches appears to be a suitable tool for the automated real-time detection  
49 of risk factors, which can be a time saving support for risk assessment and

## NLP COVID-19, Schöning (2021)

50 triage, especially in patients with long medical histories and multiple  
51 comorbidities.

NLP COVID-19, Schöning (2021)

## 52 **1 BACKGROUND**

53 Coronavirus disease 19 (COVID-19) is caused by the severe acute respiratory  
54 syndrome coronavirus 2 (SARS-CoV-2). It was first identified in Wuhan, China,  
55 in December 2019,(1) and spread globally with rising numbers of cases and  
56 deaths.(2)

57 Several risk factors have been identified for severe COVID-19 disease and  
58 need to be taken into consideration when assessing patients in the early stages  
59 since they can affect the clinical outcome and are therefore important for patient  
60 triage and management decisions. Some of the reported risk factors, such as  
61 age,(3, 4) sex,(5, 6) or obesity,(7-10) are included in tabulated form in the  
62 electronic health records (EHRs). However, information on other relevant  
63 comorbidities such as diabetes,(11-13) cardiac(14-16) and pulmonary  
64 diseases,(17, 18) cancer,(19) or dementia(20) is usually included as free-text  
65 in the medical history of the EHR and can be time consuming to retrieve. This  
66 holds in particular in patients with a long medical history and conditions that  
67 might not be included separately in the list of diagnoses (e.g. pre-diabetes).  
68 Encoding into ICD (International Classification of Diseases) identifiers – which  
69 would be highly suitable for machine processing - is often performed only after  
70 discharge or death of the patient and is thus not readily available for the risk  
71 evaluation on admission, requires human intervention, and might also only  
72 include the main diagnoses relevant to billing purposes.

73 Here we propose a real-time support for patient triage by automatically  
74 identifying relevant risk factors for infection with SARS-CoV-2 and for the  
75 development of severe COVID-19 (i.e. need for critical care, mechanical

## NLP COVID-19, Schöning (2021)

76 ventilation support, or death of any cause). A combination of data mining and  
77 natural language processing (NLP) was used to analyse different parts of the  
78 EHRs. Structured (tabulated) administrative, demographic and laboratory data  
79 as well as unstructured (free-text) medical history information were processed  
80 to identify specific risk factors (age, sex, high BMI, diabetes, cardiovascular  
81 disease, pulmonary disorders, dementia, cancer, and decreased kidney and  
82 liver function) for SARS-CoV-2 infection or severe courses of COVID-19.(15-  
83 17, 21, 22) Furthermore, for diabetic patients, the treatment regimen (untreated,  
84 insulin, oral anti-diabetics (OAD) or combination of insulin and OAD) on  
85 admission was taken into consideration to classify disease severity.

86 After development and internal validation, these methods were used in a  
87 retrospective analysis of patients seen at the Insel Hospital Group (IHG) in  
88 Switzerland, a tertiary hospital network and the biggest health care provider in  
89 Switzerland with six locations and about 860'000 patients treated per year.  
90 Patients who received testing for SARS-CoV-2 at any point during the 'first' and  
91 'second' waves of the pandemic in 2020 were included.

## 92 **2 METHODS**

### 93 **2.1 Study population**

94 The study was carried out at the IHG. The protocol was approved by the  
95 Cantonal Ethics Committee of Bern (Project-ID 2020-00973). We considered  
96 all individuals tested for SARS-CoV-2 at the IHG between February 1<sup>st</sup> through  
97 November 16<sup>th</sup> 2020– covering the 'first wave' and part of the 'second wave' of  
98 COVID-19 in the country, and who did not reject the IHG general research

## NLP COVID-19, Schöning (2021)

99 consent. For patients with no registered general research consent status, a  
100 waiver of consent was granted by the ethics committee. Patients who objected  
101 to the general research consent of the IHG were excluded from the study.  
102 Participation in other trials (including COVID-19 related treatment studies) was  
103 not an exclusion criterion and was not recorded separately. A reverse-  
104 transcriptase polymerase chain reaction (RT-PCR) assay on nasopharyngeal  
105 swabs was in use throughout the entire observational period as diagnostic test  
106 for SARS-CoV-2 detection. Detailed information on the selection of the study  
107 population is provided in **Figure 1**. All patients had been discharged or died by  
108 the time of the analysis.

109 Patients were classified according to their test result and disease severity, with  
110 the worst outcome at any point determining the class:

- 111 - *Negative*: Patients who always tested negative for SARS-CoV-2
- 112 - *Positive*: Patients who tested positive for SARS-CoV-2 at any point
  - 113 ○ *Non-severe*: Patients who tested positive for SARS-CoV-2, but
  - 114 were neither admitted to the intensive care unit (ICU) nor died of
  - 115 any cause during their hospital stay.
  - 116 ○ *Severe*: Composite outcome for patients who tested positive for
  - 117 SARS-CoV-2 and required ICU admission at any stage during the
  - 118 disease or died of any cause during their hospital stay.

119 Given that the study was retrospective and observational, sample sizes were  
120 dictated by the dynamics of the pandemic in the greater Bern region.  
121 Consequently, no formal power calculations were performed *a priori*.

## NLP COVID-19, Schöning (2021)

122 The NLP validation dataset consisted of 138 patients, who were tested positive  
123 for SARS-CoV-2 during the first wave in Switzerland (February - August 2020)  
124 and whose medical history were available. The EHR was screened manually  
125 by two of the authors for the following comorbidities of interest: arterial  
126 hypertension, chronic heart failure, atrial fibrillation or flutter, coronary heart  
127 disease, asthma, chronic obstructive pulmonary disease (COPD), diabetes  
128 (including type I, type II and pre-diabetes), dementia (including mild cognitive  
129 impairment), and cancer.(15-17, 21, 22)

### 130 **2.1.1 Data mining and Natural Language Processing**

131 Age and sex were taken directly from the structured parts of the EHR. Although  
132 BMI was also included in the structured parts, some values were not correctly  
133 calculated. Therefore, BMI were recalculated using weight and height, which  
134 are also documented in the EHR, after removing highly unrealistic values (e.g.  
135 weight of 80 kg for a <1 year old child or height of 16.3 cm for an adult), which  
136 were probably due to typing errors. Laboratory values indicative for kidney  
137 failure (estimated glomerular filtration rate (GFR) according to the Chronic  
138 Kidney Disease Epidemiology Collaboration (CKD-EPI) equation) or hepatic  
139 dysfunction (alanine aminotransferase (ALAT) and alkaline phosphatase (AP))  
140 were also taken from the structured parts of the EHR. We used the lowest and  
141 highest values measured, respectively, in the time frame between three days  
142 before and one day after the Sars-CoV-2 test as described in a previous  
143 study.(23) Kidney function was categorized into five stages: normal  
144 (GFR  $\geq$  90 mL/min), mild impairment (GFR 60-89 mL/min), moderate  
145 impairment (GFR 30-59 mL/min), severe impairment (GFR 15-29 mL/min) and  
146 kidney failure (GFR < 15 mL/min).(24) Liver function was considered as

## NLP COVID-19, Schöning (2021)

147 impaired if ALAT > 90 U/L (~3x ULN (upper limit of normal)) and/or  
148 AP > 200 U/L (~2x ULN).

149 The comorbidities of interest were identified in the medical history, which is the  
150 unstructured, free-text part of the EHR. In a first step, we merged the  
151 information of different time points into a single text file per patient and removed  
152 duplicate sentences. We then read the text files into Python as data corpus,  
153 where we performed the actual NLP (**Figure 2**). General data cleaning of these  
154 files consisted of converting special characters (e.g. umlauts such as 'ä' to 'ae'),  
155 setting the whole text to lower case, and removing dates. Then sentences were  
156 tokenized, i.e. the text was separated into single (half-) sentences (tokens).  
157 Tokens with less than two characters or information related to family history  
158 were removed. As the medical history consisted mainly of catch phrases and  
159 half-sentences, we decided against a removal of stop words. For each disease,  
160 a specific list of key terms was generated, which consisted of common terms  
161 (one or more words) and abbreviations used to describe the diseases in  
162 German EHR systems. As there are many different terms for the diverse types  
163 of cancer, another approach was chosen for this element. We first scanned all  
164 EHRs for words containing cancer-specific terms such as 'cancer', 'carcinoma',  
165 or 'neoplasia', and created a key terms list. This list was then appended with  
166 other common terms and abbreviations for specific types of cancer, for instance  
167 'ALL' for acute lymphoblastic leukaemia. For correction of spelling errors and  
168 lemmatization, the key terms list was transformed into a dictionary, where each  
169 word only appears once. Words within the medical history were replaced with  
170 the corresponding word of the dictionary when the similarity threshold of the  
171 Levenshtein distance (minimum number of characters required to transform



## NLP COVID-19, Schöning (2021)

172 one word to another) was equal or bigger than 90%. Then, for each token within  
173 the medical history, we checked for the presence of the defined key terms. If  
174 the key term consisted of more than one word (e.g. 'arterial hypertension'), the  
175 algorithm was set to allow up to three words between the single words of the  
176 key term. This further reduced the need for removing stop words.

177 If the key term was present, we determined the context of the key term  
178 (affirmation or negation) using a German implementation of *NegEx*.<sup>(25)</sup> The  
179 output of the negation detection was screened, and the negation trigger list  
180 appended accordingly where necessary (e.g. 'non-insulin'). In case of an equal  
181 or bigger number of affirmed than negated statements, the patient was tagged  
182 as 'positive' for the disease. The disease status of each patient as determined  
183 by NLP was compared to the manually tagged label. For cases where the  
184 automatically detected disease status varied from the manual one, the medical  
185 history was screened again, and, if possible, the key term list was corrected  
186 accordingly. The NLP detection was considered suitable if the error rate per  
187 disease was  $\leq 2\%$ .

188 As the structured medication on admission table was not always filled in, we  
189 decided to use a combined approach to identify anti-diabetic treatment: we  
190 selected individuals which were identified as diabetes patients by NLP and  
191 searched the EHR for key terms of treatment with insulin or OADs. We then  
192 combined these NLP results with the medication at admission table. If either  
193 the NLP or the medication at admission table showed use of insulin and/or  
194 OAD, we tagged the patient as receiving that treatment. If the patient received  
195 neither, we categorized the patient as 'untreated'. For the subgroup analysis of  
196 the OAD only cohort, we were only able to use the recorded medication on

## NLP COVID-19, Schöning (2021)

197 admission to identify metformin, the only biguanide marketed in Switzerland, as  
198 medical histories and diagnosis lists often do not mention the specific OAD  
199 used.

200 Age, sex, BMI, disease status, anti-diabetic treatment and kidney and liver  
201 function of all patients with available information were then analysed and  
202 stratified according to the cohorts described above.

### 203 **2.1.2 Software and statistical tests**

204 NLP was performed in Python (version 3.8.5). The text file corpus was  
205 generated using the Natural Language Toolkit (*nltk*) package (version 3.5).(26)  
206 Steps requiring regular expressions (e.g. text cleaning, sentence tokenization,  
207 word replacement) were performed using the *re* package (version 2.2.1). For  
208 spelling correction and lemmatization, we used the *FuzzyWuzzy* package  
209 (version 0.18.0) and specific, manually generated keyword lists. Detection of  
210 negation was performed using *NegEx*(27) in combination with its German  
211 implementation.(25)

212 Data wrangling, analysis and visualization was performed in GNU R (version  
213 4.0.2, R Foundation for Statistical Computing, <http://www.R-project.org>,  
214 Vienna, Austria). Standard statistics, e.g. Shapiro-Wilk test, Chi square,  
215 Fisher's exact test, Wilcoxon rank sum test, were conducted using the *stats*  
216 package (version 4.0.2).

217 Comparisons were performed between a) patients tested negative and positive  
218 for SARS-CoV-2 and b) patients with a non-severe and severe clinical  
219 manifestation of COVID-19. Statistical significance levels were determined  
220 using Wilcoxon rank sum test for non-normally distributed parameters, as

## NLP COVID-19, Schöning (2021)

221 confirmed by Shapiro-Wilk test, and the Chi square test or the Fisher's exact  
222 test (sample size  $\leq 5$ ) for categorical parameters. A p value of  $<0.05$  was  
223 considered statistically significant.

### 224 **3 RESULTS**

225 A total of 6'250 patients tested for SARS-CoV-2 at the IHG during the study  
226 period were included and categorized as either SARS-CoV-2 negative  
227 (n=5'664) or positive (n=586), and – among the latter- as having a non-severe  
228 (n=461) or severe (n=125) clinical outcome. The comorbidities of interest, i.e.  
229 arterial hypertension, chronic heart failure, atrial fibrillation or flutter, coronary  
230 heart disease, asthma, COPD, diabetes, dementia and cancer, could be  
231 automatically detected in the German EHR of the IHG using NLP with an error  
232 rate of  $\leq 2\%$  compared to the manually tagged EHR. The results of the  
233 validation and the key terms used for each disease are shown in the  
234 supplementary material (**Table S1** and **Table S2**).

235 Stratification of patients to the outcome showed that the proportions of patients  
236 with old age, male sex, higher BMI, arterial hypertension, or diabetes were  
237 significantly higher in the positive SARS-CoV-2 and in the severe COVID-19  
238 cohorts (**Table 1**). Patients with atrial fibrillation or flutter were more likely to be  
239 tested negative for SARS-CoV-2, but despite a tendency for more severe  
240 clinical manifestations of COVID-19, these results were not significant. The  
241 same proportion of patients with coronary heart disease was tested negative  
242 and positive for SARS-CoV-2, but with a higher proportion of patients with a  
243 severe course.

NLP COVID-19, Schöning (2021)

244 **Table 1: Distribution of risk factors as determined by automated analysis**  
 245 **of the Electronic Health Records (EHRs)**

|                                                  | <i>Test for SARS-CoV-2</i>     |                              |                              | <i>COVID-19 clinical manifestation</i> |                            |                              |
|--------------------------------------------------|--------------------------------|------------------------------|------------------------------|----------------------------------------|----------------------------|------------------------------|
|                                                  | <i>negative</i><br>(N = 5'664) | <i>positive</i><br>(N = 586) | <i>p-value</i>               | <i>non-severe</i><br>(N = 461)         | <i>severe</i><br>(N = 125) | <i>p-value</i>               |
| <b>Age (years)</b>                               |                                |                              |                              |                                        |                            |                              |
| <i>Median (IQR)</i>                              | 63<br>(39, 77)                 | 65<br>(48, 77)               | <b>0.013<sup>§</sup></b>     | 62<br>(44, 75)                         | 69<br>(59, 81)             | <b>&lt;0.002<sup>§</sup></b> |
| <b>Sex</b>                                       |                                |                              |                              |                                        |                            |                              |
| <i>Female (%)</i>                                | 2'650<br>(46.8%)               | 246<br>(42.0%)               | <b>0.029*</b>                | 211<br>(45.8%)                         | 35<br>(28.0%)              | <b>&lt;0.002*</b>            |
| <b>BMI</b>                                       |                                |                              |                              |                                        |                            |                              |
| <i>Median (IQR)</i>                              | 24.6 (21.1,<br>28.7)           | 26.5 (23.5,<br>29.7)         | <b>&lt;0.002<sup>§</sup></b> | 25.9<br>(23.2,<br>29.4)                | 27.9<br>(24.8,<br>30.9)    | <b>0.003<sup>§</sup></b>     |
| <b>Diseases</b>                                  |                                |                              |                              |                                        |                            |                              |
| <i>aHT (%)</i>                                   | 2,270<br>(40.1%)               | 270<br>(46.1%)               | <b>0.006*</b>                | 192<br>(41.7%)                         | 78<br>(62.4%)              | <b>&lt;0.002*</b>            |
| <i>Chronic heart failure (%)</i>                 | 1,591<br>(28.1%)               | 140<br>(23.9%)               | <b>0.035*</b>                | 97<br>(21.0%)                          | 43<br>(34.4%)              | <b>0.003*</b>                |
| <i>Atrial fibrillation or flutter (%)</i>        | 1,025<br>(18.1%)               | 84 (14.3%)                   | <b>0.027*</b>                | 59<br>(12.8%)                          | 25<br>(20.0%)              | 0.058*                       |
| <i>Coronary heart disease (%)</i>                | 1,052<br>(18.6%)               | 92 (15.7%)                   | 0.098*                       | 56<br>(12.2%)                          | 36<br>(28.8%)              | <b>&lt;0.002*</b>            |
| <i>Asthma (%)</i>                                | 350 (6.2%)                     | 52 (8.9%)                    | <b>0.015*</b>                | 45 (9.8%)                              | 7 (5.6%)                   | 0.203*                       |
| <i>COPD (%)</i>                                  | 612<br>(10.8%)                 | 45 (7.7%)                    | <b>0.023*</b>                | 28 (6.1%)                              | 17<br>(13.6%)              | <b>0.009*</b>                |
| <i>Diabetes (%)</i>                              | 1,129<br>(19.9%)               | 155<br>(26.5%)               | <b>&lt;0.002*</b>            | 111<br>(24.1%)                         | 44<br>(35.2%)              | <b>0.017*</b>                |
| <i>Dementia (%)</i>                              | 516 (9.1%)                     | 55 (9.4%)                    | 0.885*                       | 40 (8.7%)                              | 15<br>(12.0%)              | 0.339*                       |
| <i>Cancer (%)</i>                                | 1,407<br>(24.8%)               | 96 (16.4%)                   | <b>&lt;0.002*</b>            | 73<br>(15.8%)                          | 23<br>(18.4%)              | 0.582*                       |
| <b>Kidney function</b>                           |                                |                              |                              |                                        |                            |                              |
| <i>Normal, GFR &gt;90 mL/min (%)</i>             | 2,131<br>(36.16%)              | 196<br>(32.13%)              | 0.054                        | 163<br>(36.22%)                        | 33<br>(20.62%)             | <b>&lt; 0.002</b>            |
| <i>Mild impairment, GFR 60-89 mL/min (%)</i>     | 1,871<br>(31.74%)              | 239<br>(39.18%)              | <b>&lt;0.002*</b>            | 187<br>(41.56%)                        | 52<br>(32.50%)             | 0.055                        |
| <i>Moderate impairment, GFR 30-59 mL/min (%)</i> | 1,299<br>(22.04%)              | 116<br>(19.02%)              | 0.095                        | 77<br>(17.11%)                         | 39<br>(24.38%)             | 0.058                        |

NLP COVID-19, Schöning (2021)

|                                                  | <i>Test for SARS-CoV-2</i>     |                              |                | <i>COVID-19 clinical manifestation</i> |                            |                   |
|--------------------------------------------------|--------------------------------|------------------------------|----------------|----------------------------------------|----------------------------|-------------------|
|                                                  | <i>negative</i><br>(N = 5'664) | <i>positive</i><br>(N = 586) | <i>p-value</i> | <i>non-severe</i><br>(N = 461)         | <i>severe</i><br>(N = 125) | <i>p-value</i>    |
| <b>Severe impairment, GFR 15-29 mL/min (%)</b>   | 385 (6.53%)                    | 37 (6.07%)                   | 0.720          | 13 (2.89%)                             | 24 (15.00%)                | <b>&lt;0.002*</b> |
| <b>Kidney failure, GFR &lt;15 mL/min (%)</b>     | 208 (3.53%)                    | 22 (3.61%)                   | 1              | 10 (2.22%)                             | 12 (7.50%)                 | <b>0.005*</b>     |
| <b>Liver function Elevated liver enzymes (%)</b> | 837 (16.89%)                   | 74 (13.99%)                  | 0.101          | 30 (9.62%)                             | 26 (26.26%)                | <b>&lt;0.002*</b> |
| <b>Diabetes management</b>                       |                                |                              |                |                                        |                            |                   |
| <i>Untreated (%)</i>                             | 336 (29.8%)                    | 38 (24.5%)                   | 0.210*         | 27 (24.3%)                             | 11 (25.0%)                 | 1*                |
| <i>Insulin and OADs (%)</i>                      | 258 (22.9%)                    | 43 (27.7%)                   | 0.213*         | 30 (27.0%)                             | 13 (29.6%)                 | 0.907*            |
| <i>Insulin only (%)</i>                          | 231 (20.5%)                    | 23 (14.8%)                   | 0.124*         | 10 (9.0%)                              | 13 (29.6%)                 | <b>0.003*</b>     |
| <i>OAD only (%)</i>                              | 304 (26.9%)                    | 51 (32.9%)                   | 0.143*         | 44 (39.6%)                             | 7 (15.9%)                  | <b>0.008*</b>     |
| <i>Incl. metformin (%)</i>                       | -                              | -                            | -              | 21 (18.9%)                             | 2 (4.6%)                   | <b>0.024**</b>    |
| <i>Excl. metformin (%)</i>                       | -                              | -                            | -              | 23 (20.7%)                             | 5 (11.46%)                 | 0.247**           |

246 Bold numbers indicate significant differences (p <0.05) between compared groups. aHT: arterial  
 247 hypertension, BMI: body mass index, COPD: chronic obstructive pulmonary disease, GFR:  
 248 glomerular filtration rate, IQR: interquartile range, OAD: oral anti-diabetics, \$ Wilcoxon rank  
 249 sum test, \* Chi Square test \*\*Fisher test

250

251 Patients suffering from chronic heart failure or COPD were less likely to be  
 252 tested positive for SARS-CoV-2, but more likely to develop a severe COVID-19  
 253 course. In contract, significantly more asthmatic patients were tested positive  
 254 for SARS-CoV-2 than negative. However, with regards to clinical manifestation,  
 255 no difference could be observed between the two groups. Cancer patients were  
 256 less likely to be tested positive for SARS-CoV-2, but no significant difference in  
 257 severity was observed.

## NLP COVID-19, Schöning (2021)

258 Diabetes treatment was not associated with the risk for tested positive for  
259 SARS-CoV-2, but with its clinical consequences. Treatment with OAD only was  
260 significantly associated with less cases of a severe outcome, whereas  
261 treatment with insulin only showed the opposite effect. A subgroup analysis of  
262 the OAD only group showed that this effect might be linked to metformin. No  
263 differences were seen for untreated and insulin/OAD co-medicated patients.

264 Normal kidney function around the time of SARS-CoV-2 testing was associated  
265 with benign courses, whereas a severely impaired kidney function of kidney  
266 failure was more often seen in severe cases. Additionally, elevated liver  
267 enzymes were also seen more often in cases with severe COVID-19.

## 268 **4 DISCUSSION**

269 During the ongoing pandemic, the swift identification of patients at risk for  
270 infection and severe courses of COVID-19 is highly important. Manual  
271 identification of risk factors is a time-consuming task, especially for patients with  
272 co-morbidities, as the respective medical histories might be very long. Using  
273 NLP on EHRs poses several challenges, as written clinical text contains  
274 abbreviations, acronyms, spelling errors, and nested negations.(28)  
275 Furthermore, most available software solutions focus on English language text.  
276 We were able to develop a suitable NLP algorithm to automatically detect  
277 relevant risk factors for COVID-19 in the medical history of patients at time of  
278 admission. The selected key terms allowed for a detection in German EHRs  
279 with an error rate of  $\leq 2\%$  on the validation dataset and thus can be used for  
280 automated real-time detection to support risk assessment and triage at point-  
281 of-care.

## NLP COVID-19, Schöning (2021)

282 Old age, male sex, higher BMI, arterial hypertension, and diabetes were  
283 identified as risk factors for a positive COVID-19 test result as well as for a more  
284 severe clinical outcome. This is in line with observations of other studies and  
285 reviews.(29) Old age is generally accepted as a risk factor for severe clinical  
286 manifestations, probably due to coexisting age-dependent risk factors (e.g.  
287 diabetes, arterial hypertension, coronary heart disease, malnutrition) and  
288 remodelling of the immune system (immunosenescence).(3, 4, 30) Sex-specific  
289 differences in immune response during COVID-19 might be responsible for the  
290 higher vulnerability of males,(5, 31) but also life style (e.g. personal hygiene  
291 and smoking)(32) might contribute to this observation. Obesity is not only  
292 associated with other comorbidities such as diabetes and arterial hypertension,  
293 but also several physiological changes, e.g. chronic inflammation, endocrinal  
294 dysfunction, impaired pulmonary perfusion, and immune dysregulation, which  
295 may contribute to severe clinical manifestations.(7-10) Furthermore, several  
296 comorbidities can often also coexist and a number of two or more comorbidities  
297 were a significant factor for a more severe COVID-19 clinical outcome in  
298 previous studies.(33)

299 Diabetes was seen in approximately one third of patients with a severe disease  
300 course. This proportion was within the range of other studies.(34, 35)  
301 Monotherapy of diabetes before admission in COVID-19 patients with insulin  
302 was associated with a higher percentage of severe outcomes (29.6% vs. 9.0%).  
303 By contrast, OAD treatment that included metformin was associated with a  
304 higher percentage of non-severe disease progression (18.9% vs. 4.6%). This  
305 decrease in severity was significant for the metformin group ( $p < 0.02$ ). OAD  
306 treatment that did not include metformin was not significantly associated with

## NLP COVID-19, Schöning (2021)

307 disease severity. This is in line with recent clinical reports that metformin  
308 treatment of diabetic COVID-19 patients resulted in a reduced mortality  
309 rate.(36-38) Metformin acts by activating the AMP-activated protein kinase  
310 AMPK,(39) which then phosphorylates angiotensin-converting enzyme 2  
311 (ACE2) causing increase in ACE2 expression.(40) Even though ACE2 serves  
312 as molecular target for SARS-CoV-2, it also exhibits protective effects.(41-45)  
313 Furthermore, AMPK also inhibits the protein kinase B (AKT)/mammalian target  
314 of rapamycin (mTOR) pathway that is essential for viral translation.(46) Finally,  
315 metformin, inhibits inflammatory pathways and elevated inflammatory immune  
316 responses (cytokine storms).(47)

317 Possible reasons for the observation that COPD was associated with lower  
318 proportion of a positive test for COVID-19, which is also seen in other published  
319 data,(48) include a potential effect of smoking, the most predominant risk factor  
320 for the development of COPD. Smokers have been reported to be less  
321 susceptible to COVID-19.(49, 50) Furthermore, given the common symptoms  
322 of COPD such as cough, increased phlegm, shortness of breath, and  
323 decreased oxygen levels, it is also possible that due to the similarity in clinical  
324 presentation with a SARS-CoV-2 infection might lead to a higher test rate in  
325 COPD patients and thus more negative SARS-CoV-2 test results, while  
326 respiratory diseases including COPD might be under-diagnosed in some  
327 positively tested cases.(33) A possible protective role of regular treatment with  
328 inhaled corticosteroids in patients with COPD or asthma was not confirmed by  
329 Schultze et al.(51) Despite the often similar symptoms, and the presence of  
330 chronic airway inflammation in both COPD and asthma, the generally better  
331 outcomes in cases with asthma might be due to the usually younger age of



## NLP COVID-19, Schöning (2021)

332 these patients or to the non-reversible structural changes of the airways in case  
333 of COPD.

334 Our study has several limitations. As the IHG is a major hospital centre in the  
335 region, patients admitted to the hospital for other reasons were also tested for  
336 SARS-CoV-2 if they displayed any symptoms indicative for COVID-19. The  
337 patients in the SARS-CoV-2 negative cohort probably have more health-related  
338 problems than the general population. This effect is further corroborated as we  
339 only analysed patients with available EHRs, and, due to the retrospective  
340 nature of the study, had no information on patients tested at the ambulant  
341 COVID-19 test centre without being admitted to the IHG as in- or out-patients.  
342 This was partially mitigated by including records from the three months  
343 preceding diagnosis. Therefore the higher incidence of specific comorbidities in  
344 the SARS-CoV-2 negative cohort might represent a selection bias. Additionally,  
345 we did not perform a case-controlled study or adjusted for confounding factors  
346 such as smoking or age. Furthermore, with the exception of diabetes and renal  
347 function, we did not differentiate between the different stages and severities of  
348 the diseases. This issue can be addressed by refining the key terms list in a  
349 subsequent study.

350 The validated error rate for the NLP detection of the different disease is around  
351 2%. Due to this low error rate, the pronounced contrast between significant  
352 features, and the large amount of EHRs analysed, it is not expected to affect  
353 statistical conclusions. The main focus of the analysis were patients tested  
354 positive for SARS-CoV-2, and approximately 25% of these patients were used  
355 for the validation of NLP and thus manually screened for the diseases of  
356 interest.

NLP COVID-19, Schöning (2021)

## 357 **5 CONCLUSION**

358 In conclusion, we were able to develop a suitable NLP algorithm to  
359 automatically detect risk factors for COVID-19 in German EHRs at time of  
360 admission with an error rate of  $\leq 2\%$ . Our technique should be relative easily  
361 transferable to other languages by amending the key terms list and the negation  
362 detection accordingly. Use of NLP and data mining can provide a timesaving  
363 support for risk assessment and triage at point-of-care, especially in patients  
364 with long medical histories and multiple comorbidities. In the future, the same  
365 technique could also be used for vaccine prioritization for the automated and  
366 time efficient identification of persons at risk.

## 367 **6 DECLARATIONS**

### 368 **6.1 Authors' contributions**

369 FH and VS conceptualized this study. VS and FH performed the data analysis.  
370 FH and EL contributed to data extraction. All authors critically revised and  
371 approved the final manuscript.

### 372 **6.2 Acknowledgements**

373 We thank Noel Frey, Myoori Wijayasingham, and the Insel Data Science Center  
374 for database and infrastructure support.

### 375 **6.3 Competing interest**

376 None.

## NLP COVID-19, Schöning (2021)

### 377 **6.4 Funding**

378 None.

### 379 **6.5 Ethics approval and consent to participate**

380 The study was approved by the Cantonal Ethics Committee of Bern (Project-ID  
381 2020-00973). Participants either agreed to a general research consent or, for  
382 participants with no registered general research consent status (neither  
383 agreement nor rejection), a waiver of consent was granted by the ethics  
384 committee.

### 385 **6.6 Availability of data and materials**

386 The datasets used and/or analyses during the current study are available from  
387 the corresponding author on reasonable request.

## 388 **7 REFERENCES**

- 389 1 Wu F, Zhao S, Yu B, et al. A new coronavirus associated with human  
390 respiratory disease in China. *Nature*. 2020 2020/03/01;**579**(7798):265-9.  
391 2 Johns Hopkins University. COVID-19 Dashboard by the Center for Systems  
392 Science and Engineering (CSSE) at Johns Hopkins University (JHU). 2020  
393 [cited 2020 17.11.2020]; Available from: <https://coronavirus.jhu.edu/map.html>  
394 3 Bencivenga L, Rengo G, Varricchi G. Elderly at time of COroNaVirus disease  
395 2019 (COVID-19): possible role of immunosenescence and malnutrition.  
396 *GeroScience*. 2020 2020/08/01;**42**(4):1089-92.  
397 4 Cunha LL, Perazzio SF, Azzi J, Cravedi P, Riella LV. Remodeling of the  
398 Immune Response With Aging: Immunosenescence and Its Potential Impact  
399 on COVID-19 Immune Response. *Frontiers in immunology*. 2020;**11**:1748-  
400 5 Peckham H, de Gruijter NM, Raine C, et al. Male sex identified by global  
401 COVID-19 meta-analysis as a risk factor for death and ITU admission. *Nature*  
402 *communications*. 2020 2020/12/09;**11**(1):6317.  
403 6 Klein SL, Dhakal S, Ursin RL, Deshpande S, Sandberg K, Mauvais-Jarvis F.  
404 Biological sex impacts COVID-19 outcomes. *PLOS Pathogens*.  
405 2020;**16**(6):e1008570.  
406 7 Kang Z, Luo S, Gui Y, et al. Obesity is a potential risk factor contributing to  
407 clinical manifestations of COVID-19. *International journal of obesity*. 2020  
408 Dec;**44**(12):2479-85.

## NLP COVID-19, Schöning (2021)

- 409 8 Kwok S, Adam S, Ho JH, et al. Obesity: A critical risk factor in the COVID-19  
410 pandemic. *Clinical obesity*. 2020 Dec;**10**(6):e12403.
- 411 9 Foldi M, Farkas N, Kiss S, et al. Obesity is a risk factor for developing critical  
412 condition in COVID-19 patients: A systematic review and meta-analysis.  
413 *Obesity reviews : an official journal of the International Association for the Study*  
414 *of Obesity*. 2020 Oct;**21**(10):e13095.
- 415 10 Sattar N, McInnes IB, McMurray JJV. Obesity Is a Risk Factor for Severe  
416 COVID-19 Infection: Multiple Potential Mechanisms. *Circulation*. 2020 Jul  
417 7;**142**(1):4-6.
- 418 11 Zhu L, She Z-G, Cheng X, et al. Association of Blood Glucose Control and  
419 Outcomes in Patients with COVID-19 and Pre-existing Type 2 Diabetes. *Cell*  
420 *metabolism*. 2020 2020/06/02/;**31**(6):1068-77.e3.
- 421 12 Tadic M, Cuspidi C. The influence of diabetes and hypertension on outcome  
422 in COVID-19 patients: Do we mix apples and oranges? *The Journal of Clinical*  
423 *Hypertension*. 2020 2020/12/25;**n/a**(n/a).
- 424 13 Lim S, Bae JH, Kwon H-S, Nauck MA. COVID-19 and diabetes mellitus: from  
425 pathophysiology to clinical management. *Nature Reviews Endocrinology*. 2021  
426 2021/01/01/;**17**(1):11-30.
- 427 14 Mehra MR, Desai SS, Kuy S, Henry TD, Patel AN. Cardiovascular Disease,  
428 Drug Therapy, and Mortality in Covid-19. *N Engl J Med*. 2020 Jun  
429 18;**382**(25):e102.
- 430 15 Ssentongo P, Ssentongo AE, Heilbrunn ES, Ba DM, Chinchilli VM.  
431 Association of cardiovascular disease and 10 other pre-existing comorbidities  
432 with COVID-19 mortality: A systematic review and meta-analysis. *PLOS ONE*.  
433 2020;**15**(8):e0238215.
- 434 16 Inciardi RM, Adamo M, Lupi L, et al. Characteristics and outcomes of  
435 patients hospitalized for COVID-19 and cardiac disease in Northern Italy.  
436 *European Heart Journal*. 2020;**41**(19):1821-9.
- 437 17 Yang J, Zheng Y, Gou X, et al. Prevalence of comorbidities and its effects  
438 in patients infected with SARS-CoV-2: a systematic review and meta-analysis.  
439 *International Journal of Infectious Diseases*. 2020 2020/05/01/;**94**:91-5.
- 440 18 Olloquequi J. COVID-19 Susceptibility in chronic obstructive pulmonary  
441 disease. *European Journal of Clinical Investigation*. 2020  
442 2020/10/01/;**50**(10):e13382.
- 443 19 Desai A, Khaki AR, Kuderer NM. Use of Real-World Electronic Health  
444 Records to Estimate Risk, Risk Factors, and Disparities for COVID-19 in  
445 Patients With Cancer. *JAMA Oncology*. 2021;**7**(2):227-9.
- 446 20 Wang Q, Davis PB, Gurney ME, Xu R. COVID-19 and dementia: Analyses  
447 of risk, disparity, and outcomes from electronic health records in the US.  
448 *Alzheimer's & Dementia*. 2021 2021/02/09/;**n/a**(n/a).
- 449 21 Nandy K, Salunke A, Pathak SK, et al. Coronavirus disease (COVID-19): A  
450 systematic review and meta-analysis to evaluate the impact of various  
451 comorbidities on serious events. *Diabetes & Metabolic Syndrome: Clinical*  
452 *Research & Reviews*. 2020 2020/09/01/;**14**(5):1017-25.
- 453 22 Liu N, Sun J, Wang X, Zhao M, Huang Q, Li H. The Impact of Dementia on  
454 the Clinical Outcome of COVID-19: A Systematic Review and Meta-Analysis.  
455 *Journal of Alzheimer's Disease*. 2020;**78**:1775-82.
- 456 23 Schöning V, Liakoni E, Baumgartner C, et al. Development and validation of  
457 a prognostic COVID-19 severity assessment (COSA) score and machine

## NLP COVID-19, Schöning (2021)

- 458 learning models for patient triage at a tertiary hospital. *Journal of Translational*  
459 *Medicine*. 2021 2021/02/05;**19**(1):56.
- 460 24 National Kidney Foundation. K/DOQI clinical practice guidelines for chronic  
461 kidney disease: evaluation, classification, and stratification. *Am J Kidney Dis*  
462 2002;**39**(2 Suppl 1):S1-266.
- 463 25 Cotik V, Roller R, Xu F, Uszkoreit H, Budde K, Schmidt D. *Negation*  
464 *Detection in Clinical Reports Written in German*; 2016.
- 465 26 Bird S, Klein E, Loper E. *Natural Language Processing with Python*: O'Reilly  
466 Media, Inc.; 2009.
- 467 27 Chapman WW, Bridewell W, Hanbury P, Cooper GF, Buchanan BG. A  
468 Simple Algorithm for Identifying Negated Findings and Diseases in Discharge  
469 Summaries. *Journal of Biomedical Informatics*. 2001 2001/10/01/;**34**(5):301-10.
- 470 28 Dalianis H. *Clinical Text Mining: Secondary Use of Electronic Patient*  
471 *Records*: Springer Nature; 2018.
- 472 29 Wolff D, Nee S, Hickey NS, Marschollek M. Risk factors for Covid-19 severity  
473 and fatality: a structured literature review. *Infection*. 2020 2020/08/28.
- 474 30 Romero Starke K, Petereit-Haack G, Schubert M, et al. The Age-Related  
475 Risk of Severe Outcomes Due to COVID-19 Infection: A Rapid Review, Meta-  
476 Analysis, and Meta-Regression. *International Journal of Environmental*  
477 *Research and Public Health*. 2020;**17**(16):5974.
- 478 31 Takahashi T, Ellingson MK, Wong P, et al. Sex differences in immune  
479 responses that underlie COVID-19 disease outcomes. *Nature*. 2020  
480 2020/12/01;**588**(7837):315-20.
- 481 32 Anca PS, Toth PP, Kempler P, Rizzo M. Gender differences in the battle  
482 against COVID-19: Impact of genetics, comorbidities, inflammation and lifestyle  
483 on differences in outcomes. *International Journal of Clinical Practice*. 2021  
484 2021/02/01;**75**(2):e13666.
- 485 33 Guan W-j, Liang W-h, Zhao Y, et al. Comorbidity and its impact on 1590  
486 patients with Covid-19 in China: A Nationwide Analysis. *European Respiratory*  
487 *Journal*. 2020:2000547.
- 488 34 Bhatraju PK, Ghassemieh BJ, Nichols M, et al. Covid-19 in Critically Ill  
489 Patients in the Seattle Region - Case Series. *N Engl J Med*. 2020 May  
490 21;**382**(21):2012-22.
- 491 35 Arentz M, Yim E, Klaff L, et al. Characteristics and Outcomes of 21 Critically  
492 Ill Patients With COVID-19 in Washington State. *Jama*. 2020;**323**(16):1612-4.
- 493 36 Nafakhi H, Alareedh M, Al-Buthabhak K, Shaghee F, Nafakhi A, Kasim S.  
494 Predictors of adverse in-hospital outcome and recovery in patients with  
495 diabetes mellitus and COVID-19 pneumonia in Iraq. *Diabetes Metab Syndr*.  
496 2020 Dec 5;**15**(1):33-8.
- 497 37 Lally MA, Tsoukas P, Halladay CW, O'Neill E, Gravenstein S, Rudolph JL.  
498 Metformin is Associated with Decreased 30-Day Mortality Among Nursing  
499 Home Residents Infected with SARS-CoV2. *J Am Med Dir Assoc*. 2021  
500 Jan;**22**(1):193-8.
- 501 38 Kow CS, Hasan SS. Mortality risk with preadmission metformin use in  
502 patients with COVID-19 and diabetes: A meta-analysis. *J Med Virol*. 2021  
503 Feb;**93**(2):695-7.
- 504 39 Kahn BB, Alquier T, Carling D, Hardie DG. AMP-activated protein kinase:  
505 ancient energy gauge provides clues to modern understanding of metabolism.  
506 *Cell Metab*. 2005 Jan;**1**(1):15-25.

## NLP COVID-19, Schöning (2021)

- 507 40 Saheb Sharif-Askari N, Saheb Sharif-Askari F, Mdkhana B, et al. Effect of  
508 common medications on the expression of SARS-CoV-2 entry receptors in liver  
509 tissue. *Arch Toxicol.* 2020 Dec;**94**(12):4037-41.
- 510 41 Behl T, Kaur I, Bungau S, et al. The dual impact of ACE2 in COVID-19 and  
511 ironical actions in geriatrics and pediatrics with possible therapeutic solutions.  
512 *Life Sci.* 2020;**257**:118075-.
- 513 42 Li Y, Zhou W, Yang L, You R. Physiological and pathological regulation of  
514 ACE2, the SARS-CoV-2 receptor. *Pharmacol Res.* 2020;**157**:104833-.
- 515 43 Kuba K, Imai Y, Ohto-Nakanishi T, Penninger JM. Trilogy of ACE2: a  
516 peptidase in the renin-angiotensin system, a SARS receptor, and a partner for  
517 amino acid transporters. *Pharmacol Ther.* 2010;**128**(1):119-28.
- 518 44 Imai Y, Kuba K, Rao S, et al. Angiotensin-converting enzyme 2 protects from  
519 severe acute lung failure. *Nature.* 2005 2005/07/01;**436**(7047):112-6.
- 520 45 Ni W, Yang X, Yang D, et al. Role of angiotensin-converting enzyme 2  
521 (ACE2) in COVID-19. *Critical Care.* 2020 2020/07/13;**24**(1):422.
- 522 46 Karam BS, Morris RS, Bramante CT, et al. mTOR inhibition in COVID-19: A  
523 commentary and review of efficacy in RNA viruses. *J Med Virol.* 2021  
524 Apr;**93**(4):1843-6.
- 525 47 Chen X, Guo H, Qiu L, Zhang C, Deng Q, Leng Q. Immunomodulatory and  
526 Antiviral Activity of Metformin and Its Potential Implications in Treating  
527 Coronavirus Disease 2019 and Lung Injury. *Front Immunol.* 2020;**11**:2056.
- 528 48 Deslée G, Zysman M, Burgel PR, et al. Chronic obstructive pulmonary  
529 disease and the COVID-19 pandemic: Reciprocal challenges. *Respir Med Res.*  
530 2020;**78**:100764-.
- 531 49 Tajlil A, Ghaffari S, Pourafkari L, Mashayekhi S, Roshanravan N. Nicotine  
532 and smoking in the COVID-19 era. *J Cardiovasc Thorac Res.* 2020;**12**(2):136-  
533 9.
- 534 50 Farsalinos K, Barbouni A, Niaura R. Systematic review of the prevalence of  
535 current smoking among hospitalized COVID-19 patients in China: could  
536 nicotine be a therapeutic option? *Internal and emergency medicine.* 2020  
537 Aug;**15**(5):845-52.
- 538 51 Schultze A, Walker AJ, MacKenna B, et al. Risk of COVID-19-related death  
539 among patients with chronic obstructive pulmonary disease or asthma  
540 prescribed inhaled corticosteroids: an observational cohort study using the  
541 OpenSAFELY platform. *The Lancet Respiratory Medicine.* 2020;**8**(11):1106-20.

## NLP COVID-19, Schöning (2021)

### 542 **8 FIGURES**

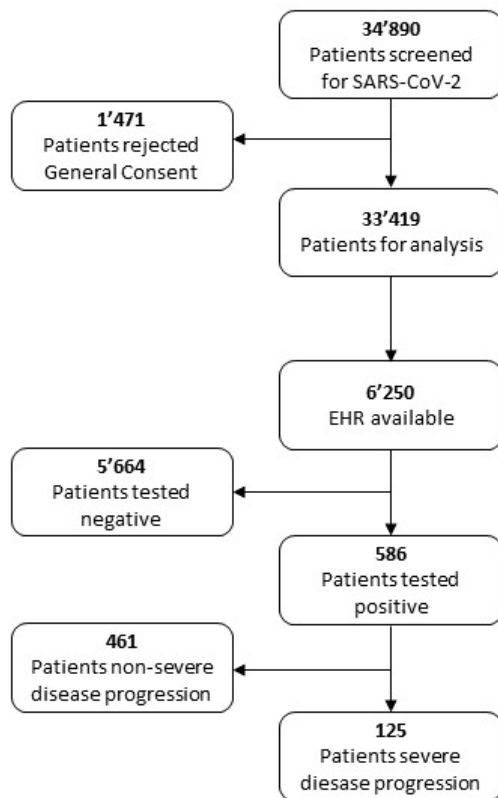

543

544 Figure 1: Flowchart of the selection of the patient population included in the  
545 study

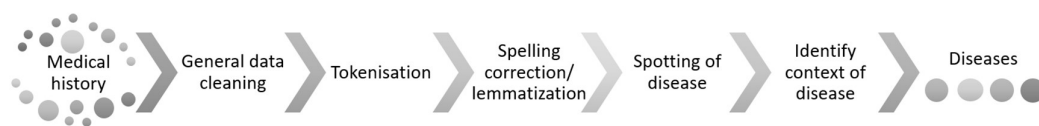

546

547 Figure 2: Data preparation steps for the detection of diseases in a free-text  
548 medical history

549



NLP COVID-19, Schöning (2021)

550 **9 SUPPLEMENTARY MATERIAL**

551 **Table S1:** Overview on error rate of Natural Language Processing (NLP)  
 552 detection of disease status on the validation dataset and the final key terms  
 553 used for NLP.

| Disease                | Error rate on validation dataset (138 cases) | Key terms                                                                                                                                                                                                                                                                                                                                                                                             |
|------------------------|----------------------------------------------|-------------------------------------------------------------------------------------------------------------------------------------------------------------------------------------------------------------------------------------------------------------------------------------------------------------------------------------------------------------------------------------------------------|
| Diabetes               | 0.7% (1/138)                                 | diabetes, diabetisch, praediabetisch, praediabetes, mellitus, zuckerkrankheit, gestationsdiabetes                                                                                                                                                                                                                                                                                                     |
| aHT                    | 0.7% (1/138)                                 | aht, arterielle hypertonie, hypertensive kardiopathie, hypertensive herzkrankheit, arterielle hypertonus, arterielle hypertension, hypertensive entgleisung, bluthochdruck, hypertensive notfall                                                                                                                                                                                                      |
| Asthma                 | 1.4% (2/138)                                 | asthma, asthma bronchiale, bronchialasthma, belastungsasthma, belastungsasthma bronchiale                                                                                                                                                                                                                                                                                                             |
| COPD                   | 0.7% (1/138)                                 | chronisch obstruktive pneumopathie, chronisch obstruktive atemwegserkrankung, chronisch obstruktive lungenerkrankung, copd, chronisch obstruktive bronchitis, chronisch bronchitis emphysem, chronisch obstruktive lungenkrankheit, obstruktive ventilationsstoerung, chronisch bronchitis lungenemphysem                                                                                             |
| Chronic heart failure  | 0.7% (1/138)                                 | herzinsuffizienz, kardiomyopathie, kardiopathie, nyha, lfef, linksherzinsuffizienz, rechtsherzinsuffizienz, hypertensive herzkrankheit, hfref, hfmref, hfpef                                                                                                                                                                                                                                          |
| Atrial fibrillation    | 0.7% (1/138)                                 | vorhofflimmern, vhf, vorhofflattern, afib, vfli, vofli, vhfli, vfla, vhflla, vofla, ehra                                                                                                                                                                                                                                                                                                              |
| Coronary heart disease | 1.4% (2/138)                                 | koronare herzerkrankung, khk, koronare herzkrankheit, stemi, nstemi, akute koronarsyndrom, acs, myokardiale minderperfusion, chronische koronarsyndrom, koronarstenose, ccs ii, ccs 2, ccs iii, ccs 3, ccs iv, ccs 4, instabile angina pectoris, ischaemische herzkrankheit, ischaemische herzerkrankung, ihk, koronaratheromatose, koronare gefaesserkrankung, koronare kardiopathie, myokardinfarkt |
| Dementia               | 1.4% (2/138)                                 | demenz, dementielle, demenzielle, mild cognitive impairment, kognitive stoerung, mci, alzheimer, dement, kognitive beeintraechtigung, lewy                                                                                                                                                                                                                                                            |



NLP COVID-19, Schöning (2021)

| Disease | Error rate on validation dataset (138 cases) | Key terms                                                                                                                                                                                                                                                        |
|---------|----------------------------------------------|------------------------------------------------------------------------------------------------------------------------------------------------------------------------------------------------------------------------------------------------------------------|
| Cancer  | 2.1% (3/138)                                 | Key terms according to Supplementary Material Table S2                                                                                                                                                                                                           |
| Insulin | -                                            | insulin, insulinpflichtig, insulinabhaengig, basisinsulintherapie, insulintherapie, insulinpumpe, insulinperfusor, insulinbasistherapie, levemir, novorapid, lantus, tresiba, toujeo, iddm]                                                                      |
| OAD     | -                                            | oad, metformin, orale anti diabetikum, orale antidiabetikum, biguanid, glitazone, sulfonylharnstoffe, glinide, inkretine, alpha glucosidasehemmer, dpp 4 inhibitor, sgl 2 inhibitor, orale anti diabetika, orale antidiabetika, sitagliptin, janumet, kombiglyze |

554

555 **Table S2:** Key terms for the detection of cancer

| Key terms                |
|--------------------------|
| adenokarzinom            |
| adenokarzinomatoes       |
| adenokarzinominfiltrate  |
| adenokarzinomzellen      |
| adenomkarzinom           |
| adenomkarzinominfiltrate |
| aderhautmelanom          |
| adnexkarzinom            |
| aktinische keratose      |
| akustikusneurinom        |
| all                      |
| alveolarzellkarzinom     |
| aml                      |
| analkarzinom             |
| analkrebs                |
| angiosarkom              |
| antrumkarzinom           |
| astrozytom               |
| augentumor               |
| basaliom                 |
| basalkarzinom            |

## NLP COVID-19, Schöning (2021)

| <b>Key terms</b>                   |
|------------------------------------|
| basalzellkarzinom                  |
| bauchspeicheldruesenkrebs          |
| bauchspeichelkrebs                 |
| blasenkarzinom                     |
| blasenkarzinom, harnblasenkarzinom |
| bronchialkarzinom                  |
| bronchuskarzinom                   |
| brustkrebs                         |
| burkitt lymphom                    |
| cervixkarzinom                     |
| cholangiokarzinom                  |
| chondrosarkom                      |
| chondrosarkom                      |
| chondrosarkomanteilen              |
| ciliarkoerpermelanom               |
| cll                                |
| cml                                |
| coecumkarzinom                     |
| colonkarzinom                      |
| corpuskarzinom                     |
| darmkrebs                          |
| denokarzinom                       |
| dermatofibrosarkoms                |
| dickdarmkarzinom                   |
| dickdarmkarzinom                   |
| dickdarmkrebs                      |
| doppelkarzinom                     |
| dünndarmkarzinom                   |
| duodenalkarzinom                   |
| eierstockkrebs                     |
| endometrioidesadenokarzinom        |
| endometriumkarzinom                |
| endometriumkarzinomrezidiv         |
| endometriumskarzinomrezidiv        |
| ependymome                         |
| ewing sarkom                       |
| ewingsarkom                        |

## NLP COVID-19, Schöning (2021)

| <b>Key terms</b>                 |
|----------------------------------|
| fibrosarkom                      |
| gallenblasenkarzinom             |
| gallengangkarzinom               |
| gastrointestinale stromakarzinom |
| gebaermutterhalskrebs            |
| gebaermutterhalskrebs            |
| gebaermutterkoerperkarzinom      |
| gebaermutterkrebs                |
| gehirntumor                      |
| genkarzinom                      |
| gist                             |
| glioblastom                      |
| gliome                           |
| haarzelleukaemie                 |
| haemangiosarkom                  |
| harnblasenkarzinom               |
| harnroehrenkarzinom              |
| hautkarzinomen                   |
| hautkrebs                        |
| hautkrebsnekrosen                |
| hautkrebssetomelanomm            |
| hemangiosarkom                   |
| hirntumor                        |
| hodenkarzinom                    |
| hodgkin                          |
| hypopharynxkarzinom              |
| hypopharynxkarzinoms             |
| hypophysentumor                  |
| kardiakarzinom                   |
| karzinoid                        |
| karzinom                         |
| karzinoma                        |
| karzinomablegers                 |
| karzinomanteile                  |
| karzinomatoese                   |
| karzinomatosa                    |
| karzinomatose                    |

## NLP COVID-19, Schöning (2021)

| <b>Key terms</b>          |
|---------------------------|
| karzinomdiagose           |
| karzinome                 |
| karzinomgewebe            |
| karzinomherd              |
| karzinominfiltrate        |
| karzinominfiltration      |
| karzinomlaenge            |
| karzinomnachweis          |
| karzinomresektion         |
| karzinomrezidiv           |
| karzinomsuspekte          |
| karzinomtypisch           |
| karzinomvolumens          |
| karzinomzellen            |
| karzinomzellverbaende     |
| karzinosarkom             |
| karzinosarkoms            |
| kehlkopfkarzinom          |
| keimzellneoplasie         |
| knochenkrebs              |
| kolonkarzinom             |
| kolorektalkarzinom        |
| korpuskarzinom            |
| krebs                     |
| krebsbehandlung           |
| krebsdiagnose             |
| krebserkrankung           |
| krebserkrankungen         |
| krebskrank                |
| larynxkarzinom            |
| leberkrebs                |
| leberzellkrebs            |
| leiomyosarkom             |
| leukaemie                 |
| leukaemiediagnose         |
| leukaemieinfiltrate       |
| leukaemieklonspezifischen |

## NLP COVID-19, Schöning (2021)

| <b>Key terms</b>                        |
|-----------------------------------------|
| leukaemiepersistenz                     |
| leukaemierezidiv                        |
| leukaemiezellen                         |
| leyomyosarkom                           |
| lidtumor                                |
| liposarkom                              |
| liposarkomanteile                       |
| lippentumor                             |
| lungenadenokarzinom                     |
| lungenkarzinom                          |
| lungenkrebs                             |
| lymphangiokarzinomatose                 |
| lymphdruesenkrebs                       |
| lymphgranulomatose                      |
| lymphomlymphknotenmetastasenprogression |
| magenkarzinom                           |
| magenkrebs                              |
| malignes myelom                         |
| mammakarzinom                           |
| mastdarmkarzinom                        |
| medulloblastome                         |
| melanom                                 |
| melanoma                                |
| melanomentfernung                       |
| melanomexzision                         |
| melanomnachweis                         |
| melanomzellen                           |
| meningeome                              |
| mikrokarzinom                           |
| mischgliom                              |
| morbus kahlermundhoehlenkarzinom        |
| multiple myelom                         |
| mycosis fungoides                       |
| myxofibrosarkom                         |
| nasennebenhoehlentumor                  |
| nasentumor                              |
| nasopharynxkarzinom                     |

## NLP COVID-19, Schöning (2021)

| <b>Key terms</b>         |
|--------------------------|
| nebennierenkarzinom      |
| nebennierenneoplasie     |
| nebenschilddrüeskarzinom |
| neoplasie                |
| neoplasieassoziiert      |
| neoplasiebedingt         |
| neoplasiein              |
| neoplasien               |
| nephroblastom            |
| netzhauttumor            |
| neurinom                 |
| neuroblastom             |
| nierenkarzinom           |
| nierenzellkarzinom       |
| nstmammakarzinom         |
| oesophaguskarzinom       |
| oligoastrozytome         |
| oligodendrogliome        |
| organmetastasen          |
| oropharynxkarzinom       |
| osteosarkom              |
| osteosarkom              |
| osteosarkomresektion     |
| ovarialkarzinom          |
| pankeasneoplasie         |
| pankreaskarzinom         |
| pankreaskopfkarzinom     |
| pankreaskopfneoplasie    |
| pankreaskorpuskarzinom   |
| pankreaskorpusneoplasie  |
| pankreasneoplasie        |
| pankreasschwanzkarzinom  |
| papillenkarzinom         |
| paraneoplasie            |
| peniskarzinom            |
| peritonealkarzinom       |
| peritonealkarzinomatose  |

## NLP COVID-19, Schöning (2021)

| <b>Key terms</b>                |
|---------------------------------|
| pharynxkarzinom                 |
| plasmazellenneoplasie           |
| plasmazellmyelom                |
| plasmazellneoplasie             |
| plasmozytom                     |
| platteneithelkarzinom           |
| platteneithelkarzinominfiltrate |
| platteneithelungenkarzinom      |
| platteneithelzellkarzinom       |
| plexustumor                     |
| primaerkarzinom                 |
| primaertumor                    |
| promyelozytenleukaemie          |
| prostatakarzinom                |
| prostatakrebs                   |
| rachentumor                     |
| rektumkarzinom                  |
| retinoblastom                   |
| rezidivurothelkarzinom          |
| rhabdomyosarkom                 |
| rhabdomyosarkomatoese           |
| samenblasenkarzinom             |
| sarkom                          |
| sarkomatoes                     |
| sarkomatoide                    |
| sarkomgewebe                    |
| sarkomresektion                 |
| sarkomrezidiv                   |
| sarkomrezidivresektion          |
| sarkomzellen                    |
| schadelbasismetastase           |
| schaedelmetastase               |
| scheidenkarzinom                |
| schildddruesenkarzinom          |
| schildddruesenneoplasie         |
| siegelringzellkarzinom          |
| sigmakarzinom                   |

## NLP COVID-19, Schöning (2021)

| <b>Key terms</b>                       |
|----------------------------------------|
| speicheldrüesenzkarzinom               |
| speiseröhrenkarzinom                   |
| spinaliom                              |
| spinalzellkarzinom                     |
| stachelzellkarzinomstachelzellkarzinom |
| stimmlippenkarzinom                    |
| synovialsarkom                         |
| thymon                                 |
| thymuskarzinom                         |
| tonsillenzkarzinom                     |
| tritonskarzinoms                       |
| tubenzkarzinom                         |
| unterleibskrebs                        |
| urachuskarzinom                        |
| urogenitalkarzinom                     |
| urothelkarzinomrezidiv                 |
| urothelkarzinomzellen                  |
| uteruskarzinom                         |
| uterussarkom                           |
| urothelkarzinom                        |
| vaginalkarzinom                        |
| vulvakarzinom                          |
| weichteilsarkom                        |
| wilmstumor                             |
| zervixkarzinom                         |
| zervixkarzinomnachsorge                |
| zoekumkarzinom                         |
| zungengrundkarzinom                    |
| zungenzkarzinom                        |
| zweitkarzinom                          |
| zystadenokarzinom                      |

556
